# Supplementary material for: A meta-analysis of genome-wide association studies of childhood wheezing phenotypes identifies ANXA1 as a susceptibility locus for persistent wheezing
Source: eLife journal article supplement (doi:10.7554/elife.84315), 2023-05-25
Supplement: supp [file elife_poa_e84315_Figure_2_figure_supplement_1.pdf › elife_poa_e84315_Figure_2_figure_supplement_1.pdf]

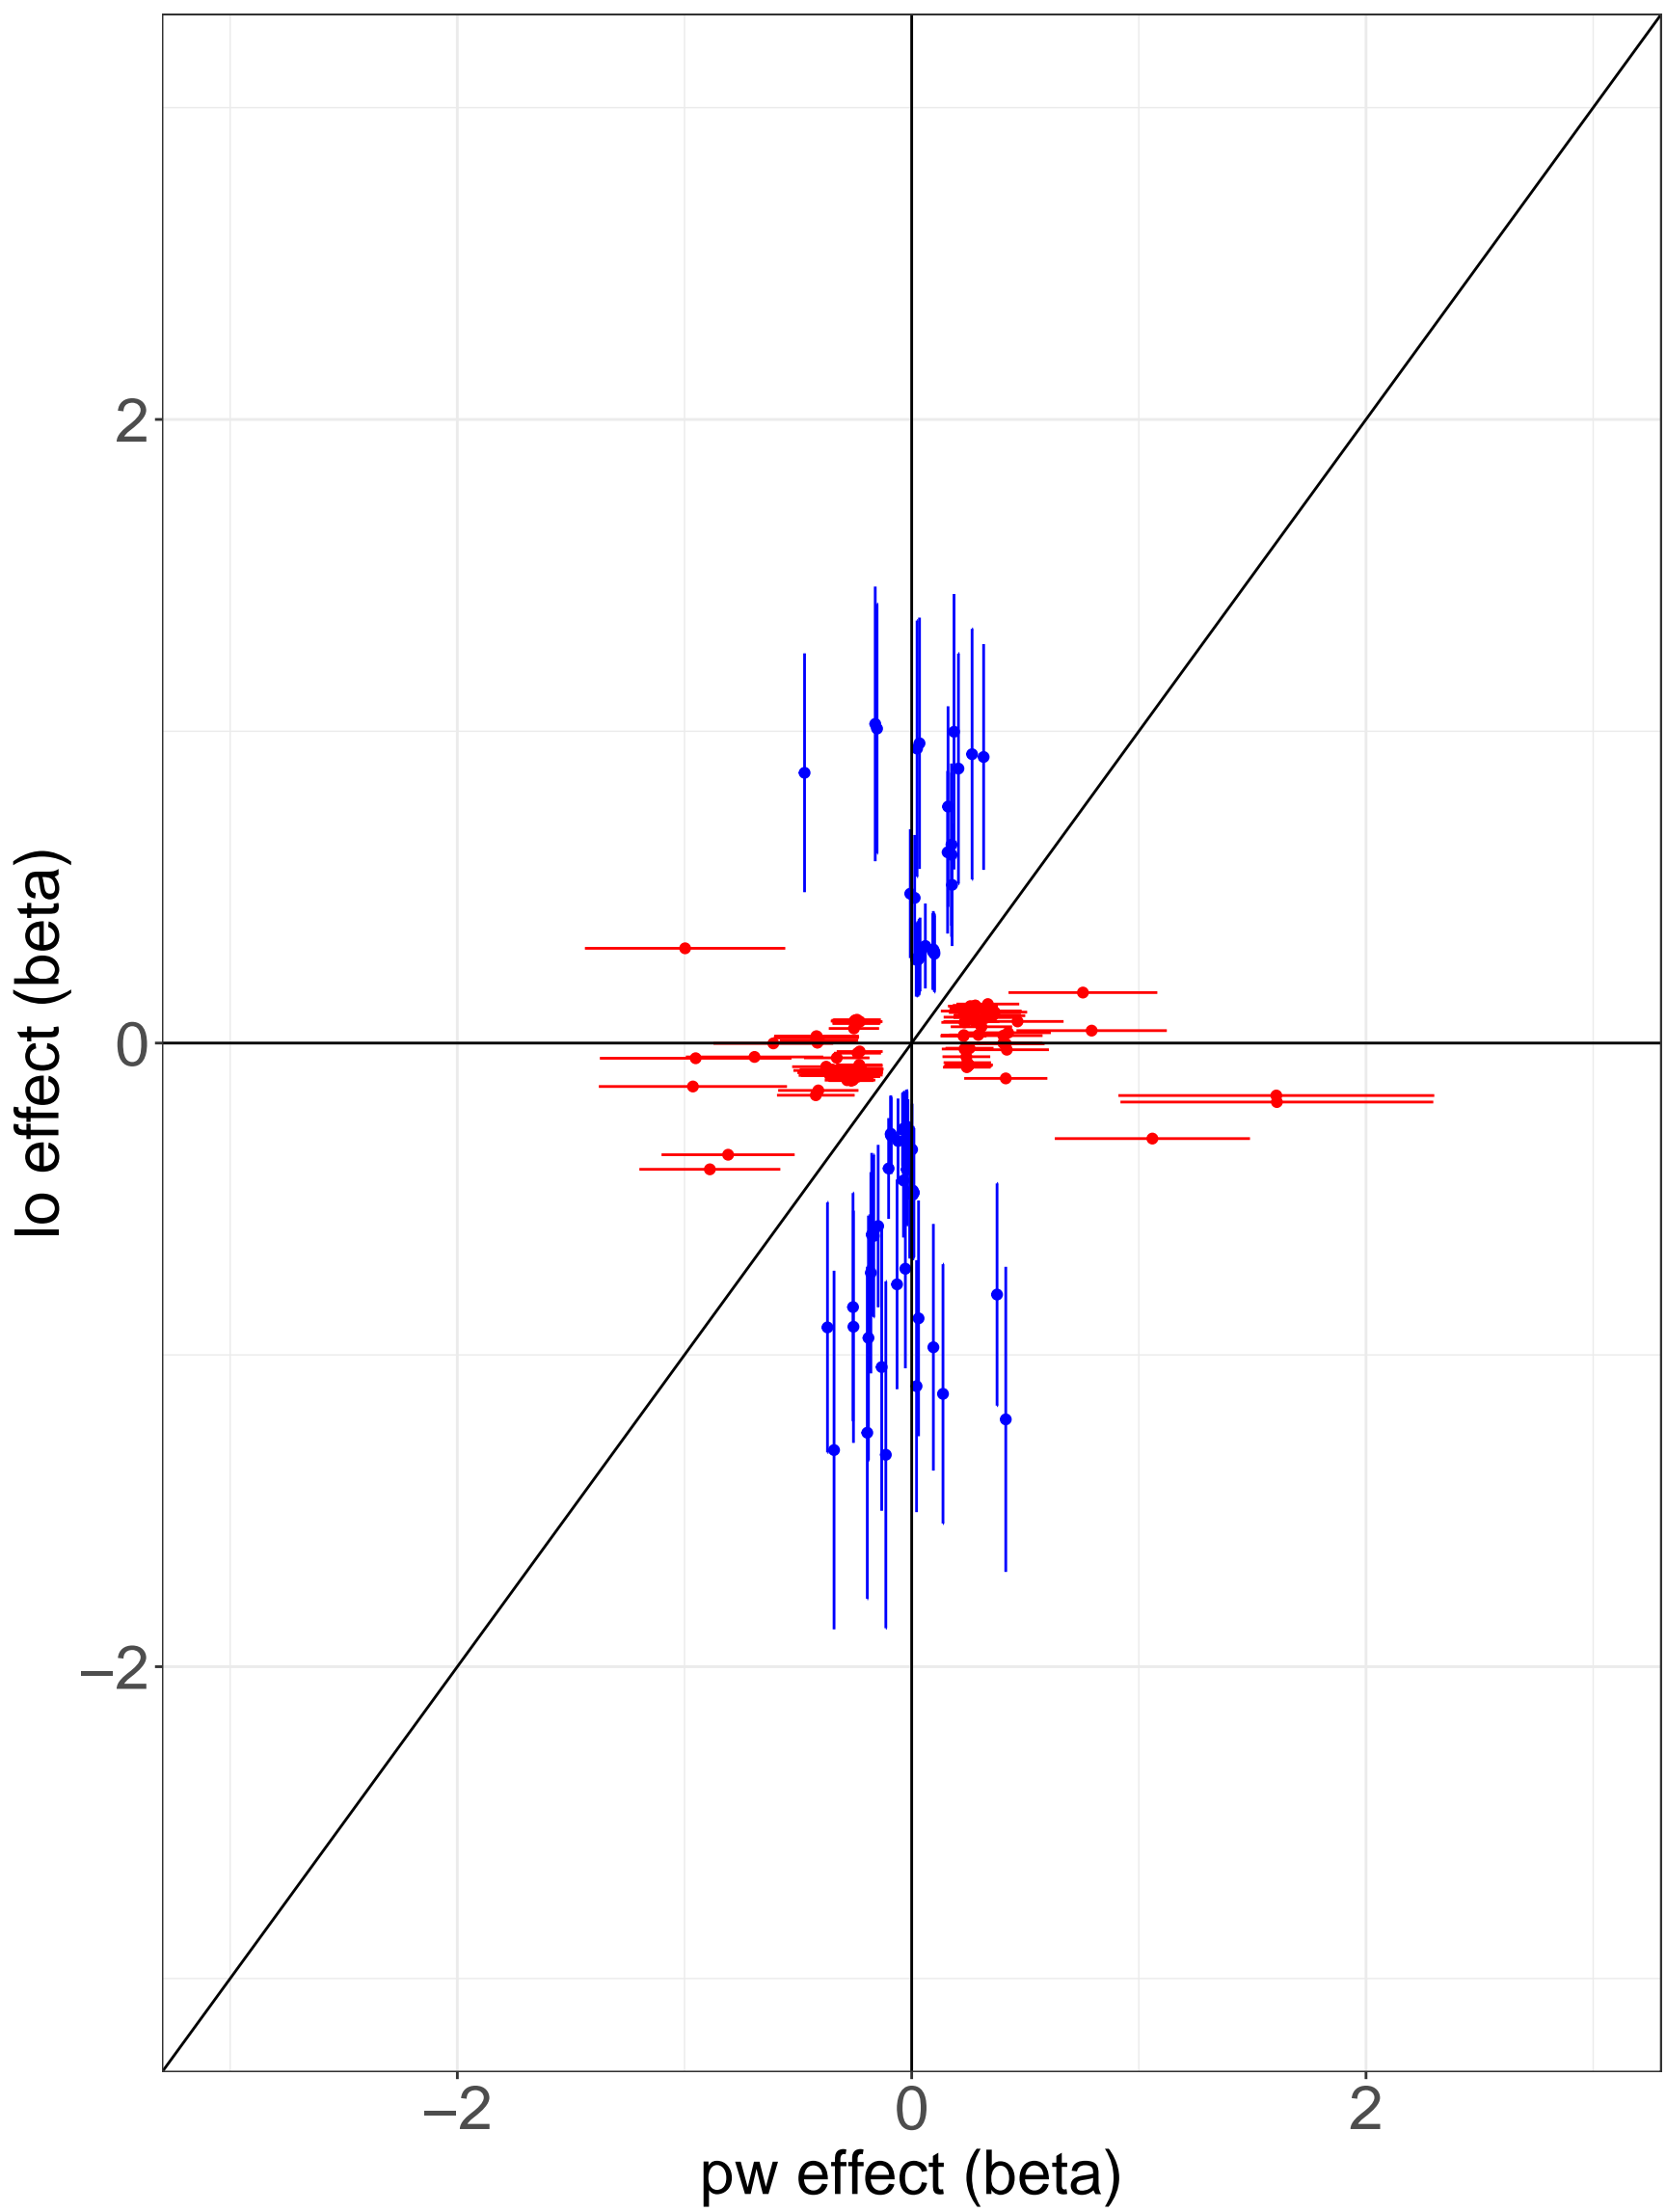

- pw specific
- lo specific
- Same direction
- Opposite direction

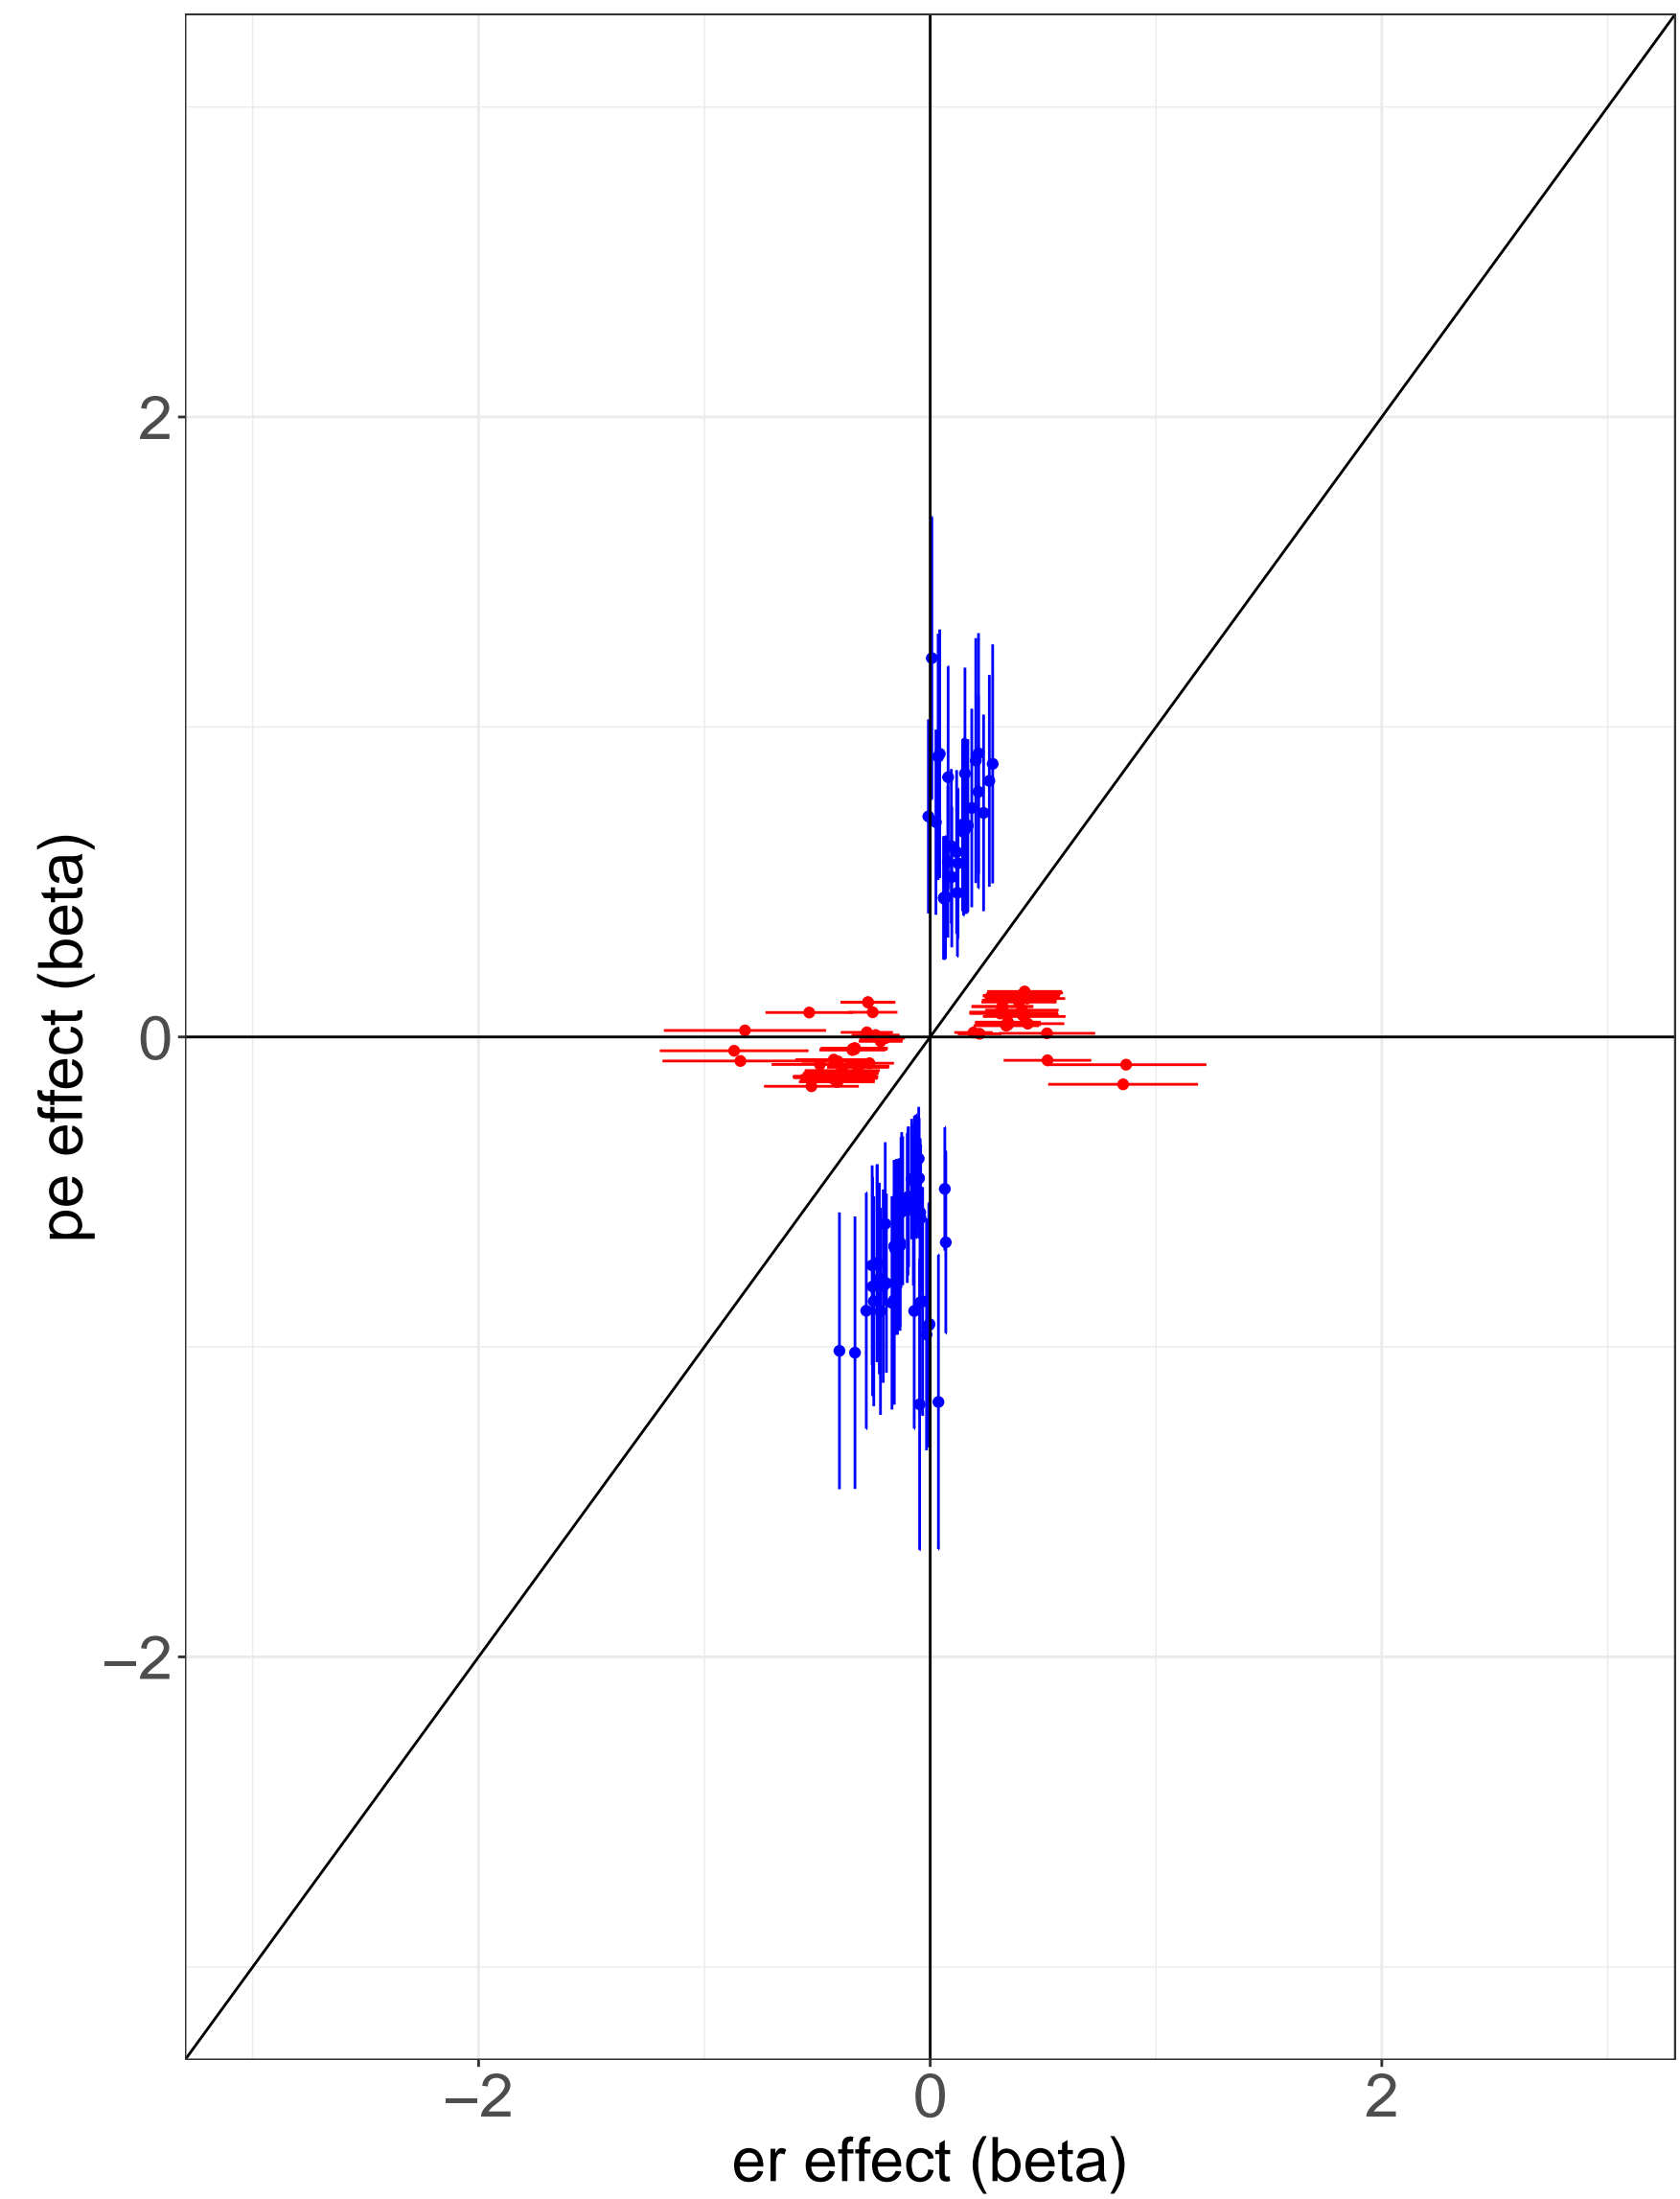

- er specific
- pe specific
- Same direction
- Opposite direction

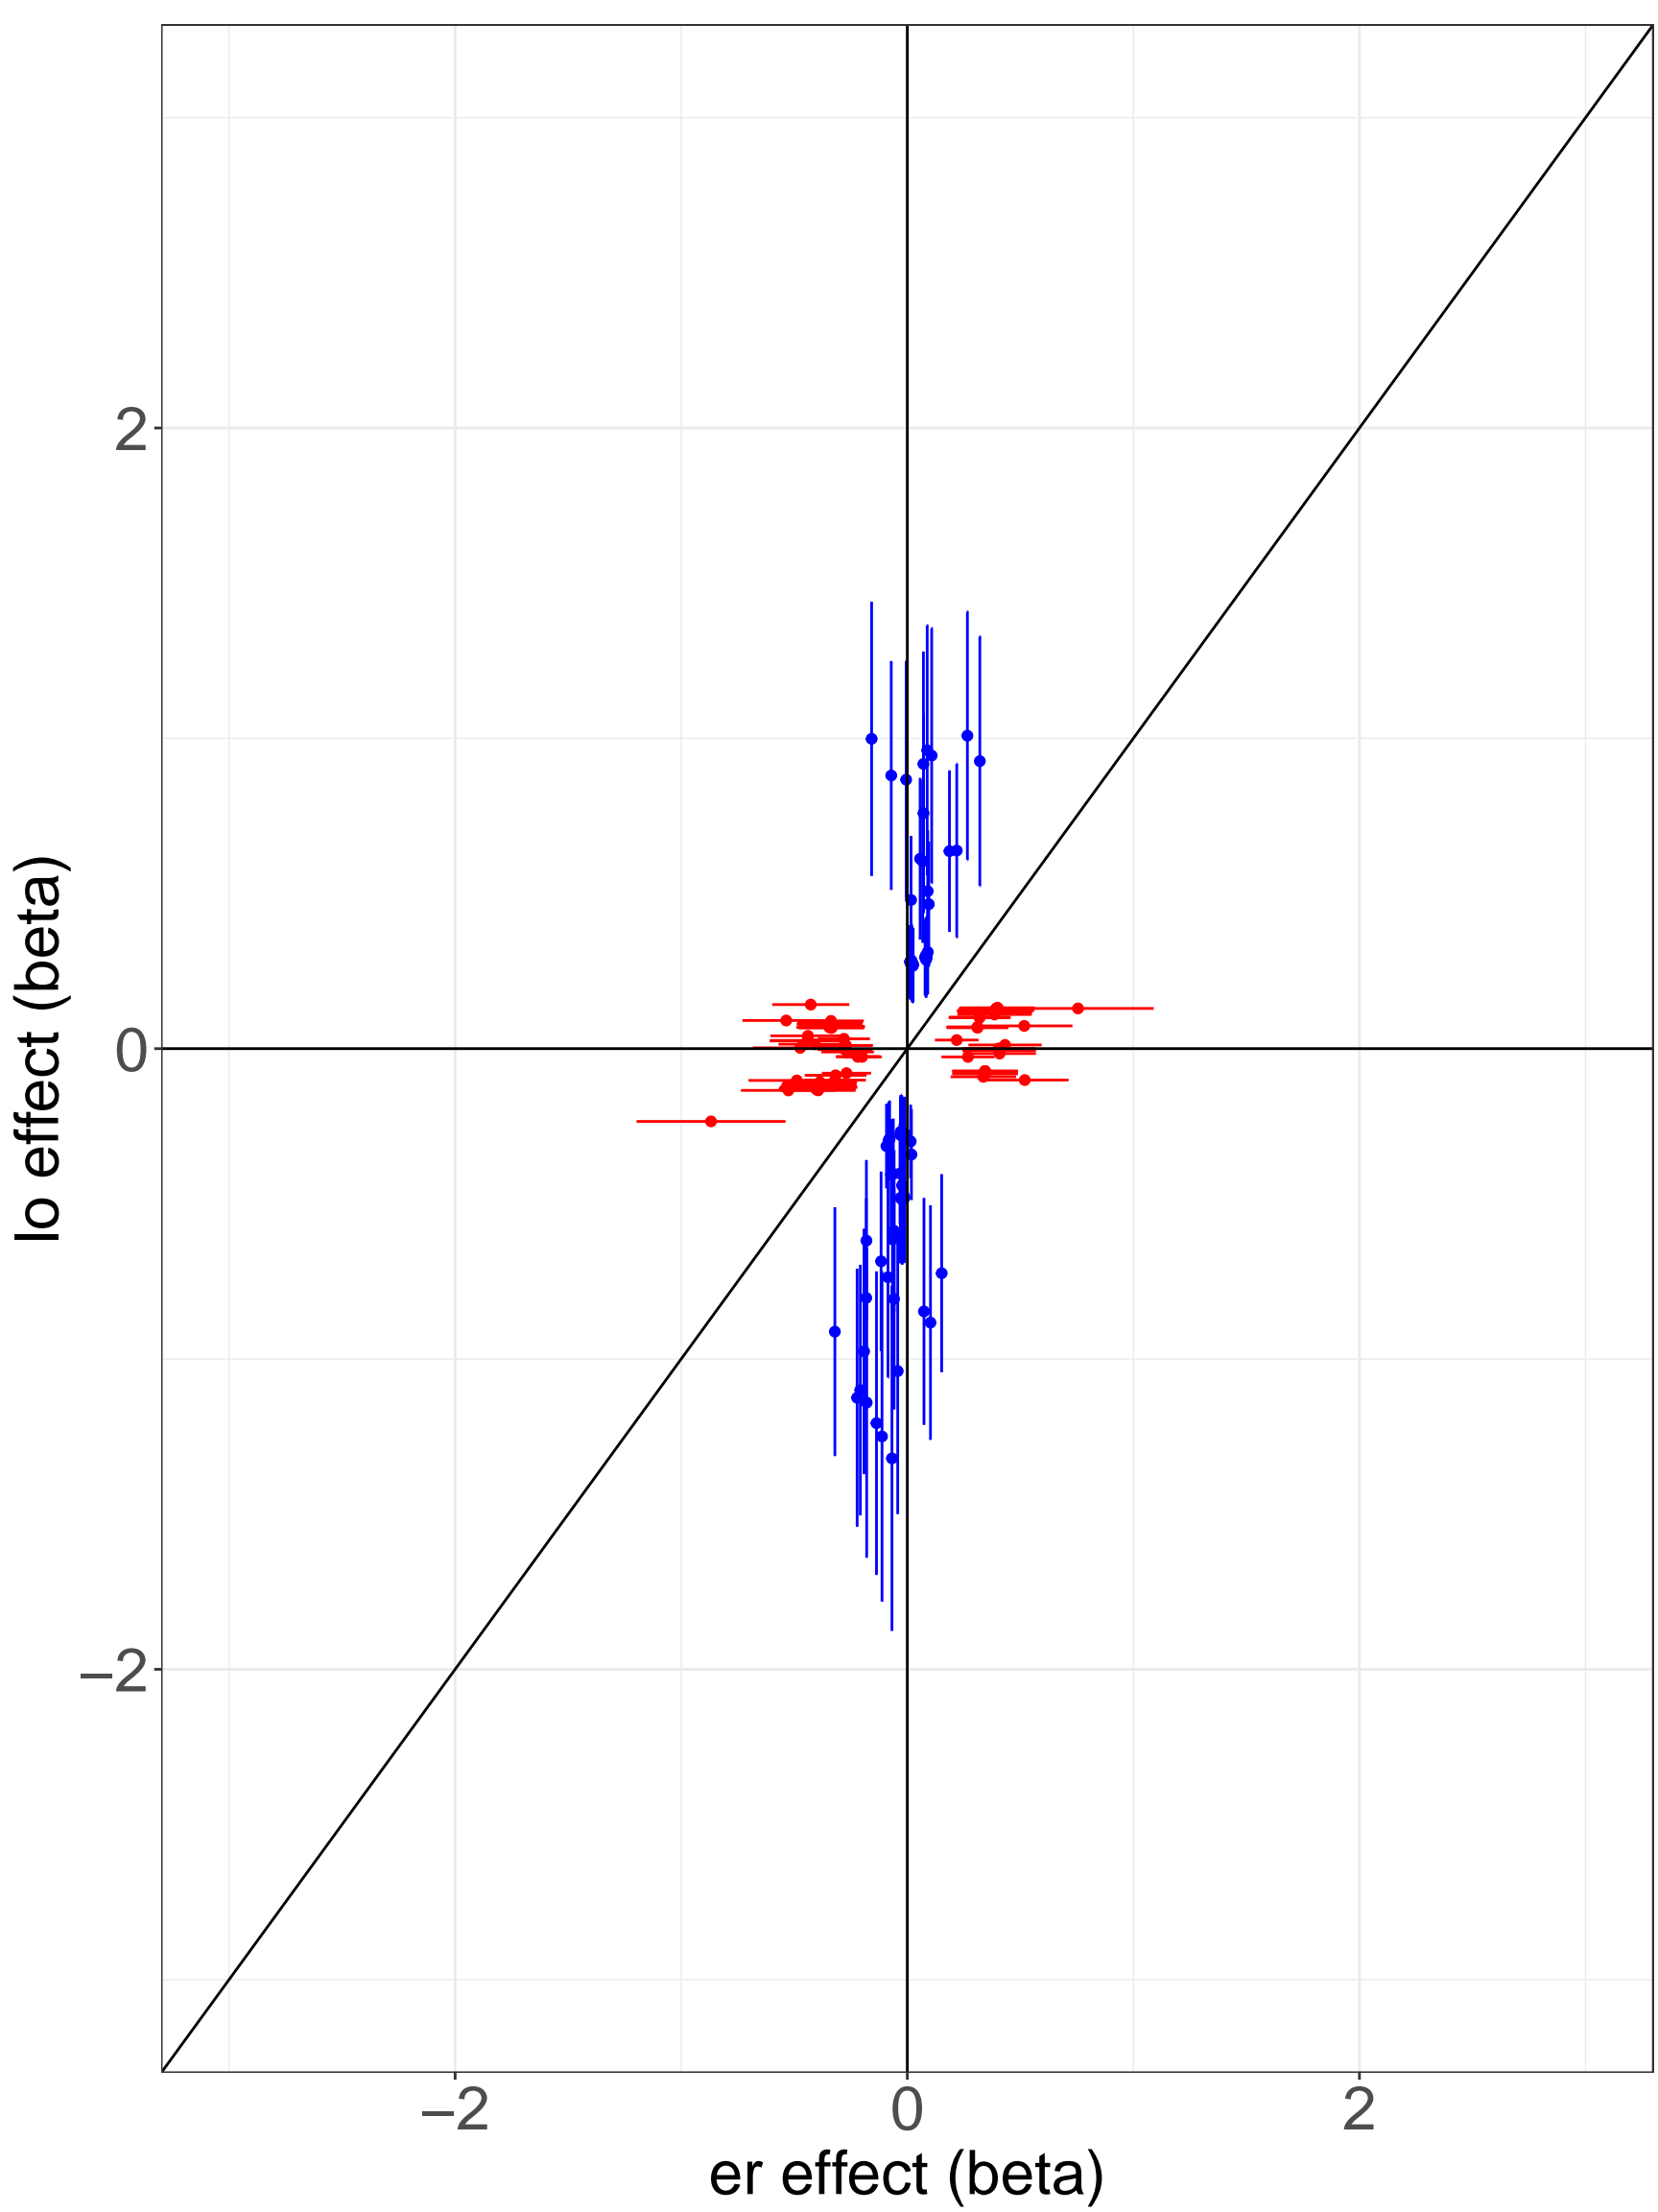

- er specific
- lo specific
- Same direction
- Opposite direction

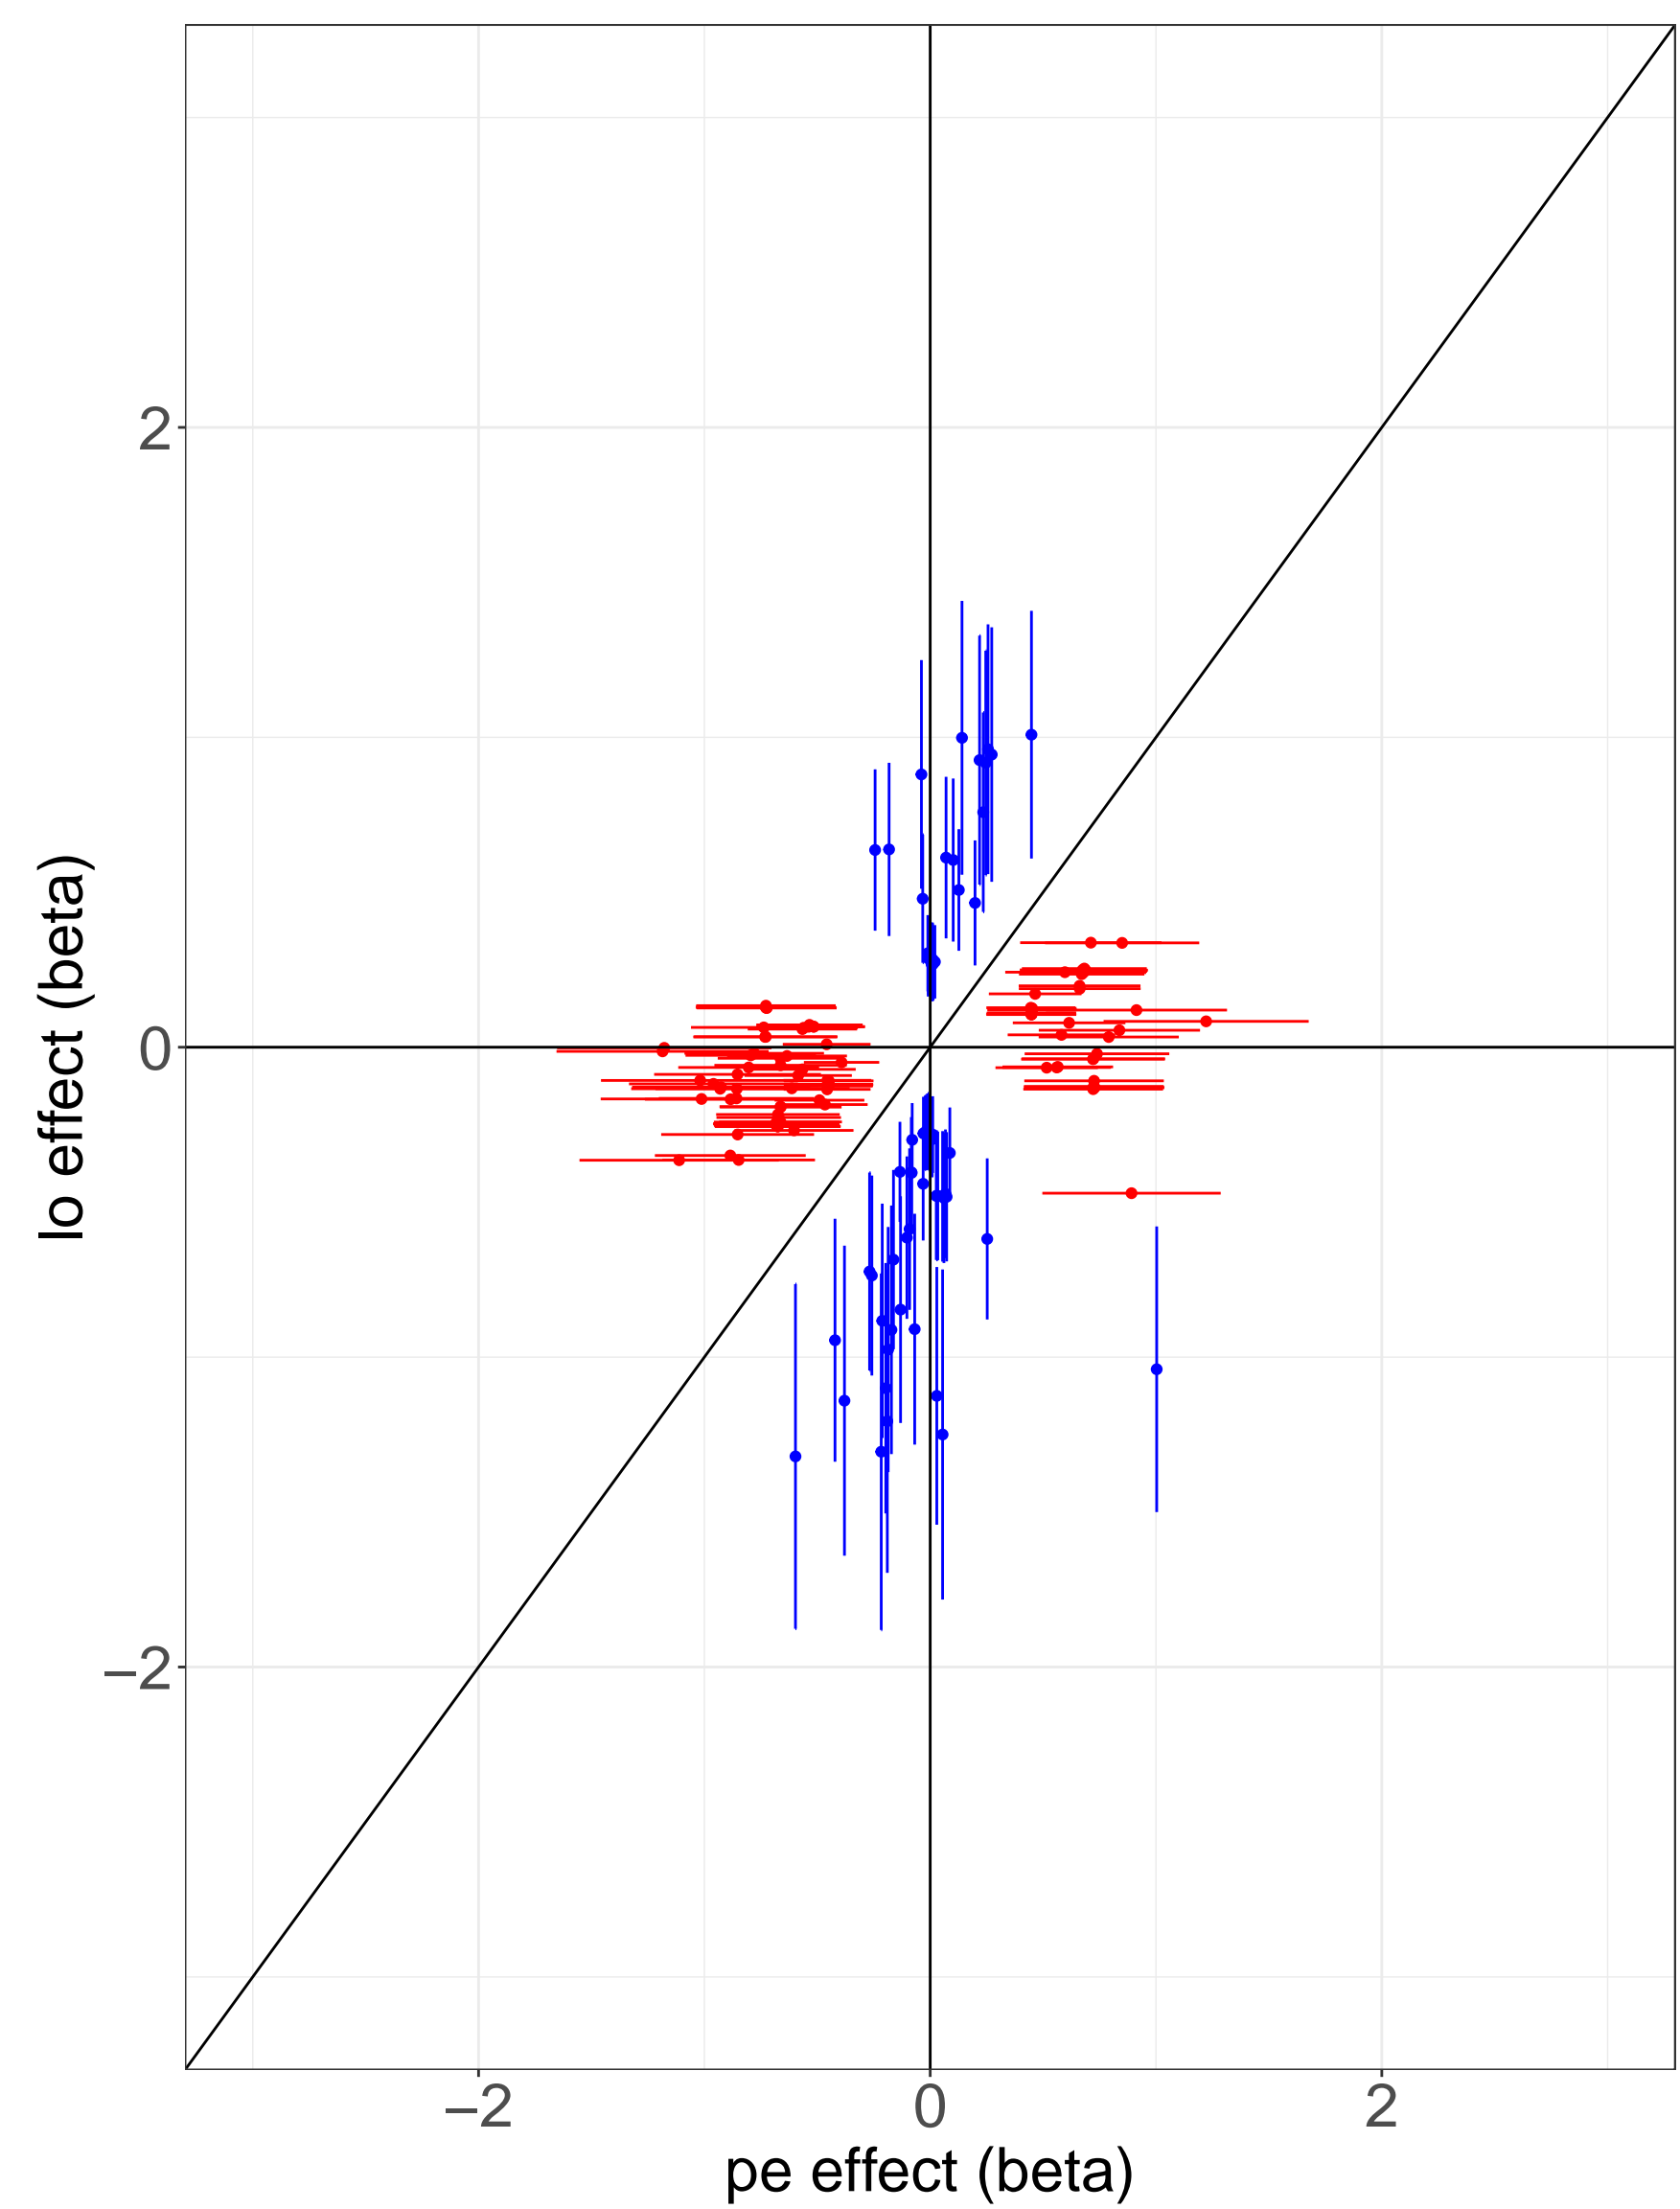

- pe specific
- lo specific
- Same direction
- Opposite direction
